# Supplementary material for: Multi-functional self-healing polyurethane elastomer based on chair conformation for strain sensors
Source: Royal Society of Chemistry journal article supplement (doi:10.1039/d4ta05598e), 2024-01-01
Supplement: d4ta05598e1.pdf [file d4ta05598e1.pdf]

## **Multi-Functional Self-Healing Polyurethane Elastomer Based on Chair Conformation for Strain Sensors**

**Yiyao Zhu<sup>a,1</sup>, Yuting He<sup>b,1</sup>, Wentong Lu<sup>a</sup>, Hao Tian<sup>a</sup>, Fan Fei<sup>a</sup>,  
Peilong Zhou<sup>a</sup>, Jincheng Wang<sup>a\*</sup>**

- a) Department of Polymer Materials and Engineering, College of Chemistry and Chemical Engineering, Shanghai University of Engineering Science, Shanghai 201620, People's Republic of China.  
Correspondence to: Jincheng Wang (E-mail: [wjc406@sues.edu.cn](mailto:wjc406@sues.edu.cn))
- b) Department of Geriatrics, Zhongshan Hospital, Fudan University, 180 Fenglin Road, Shanghai 200032, China

#Yiyao Zhu and Yuting He contributed equally to this manuscript.

## PCLU

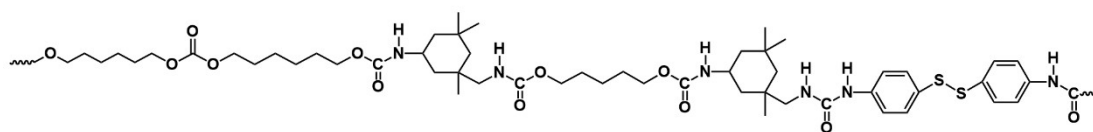

## PCBU

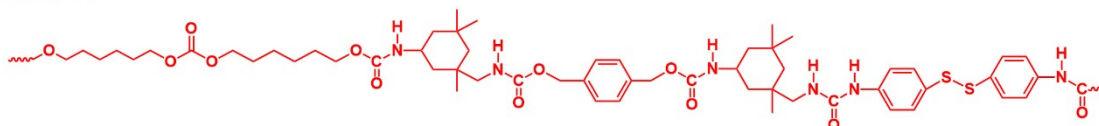

## cis-PCCU

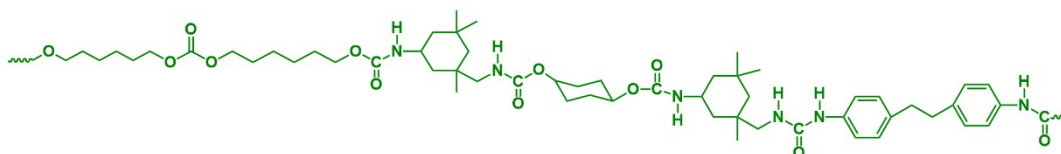

## trans-PCCU

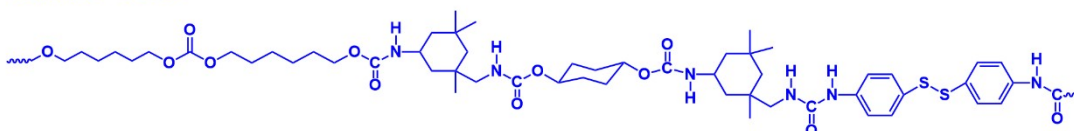

**Fig. S1** Chemical structural formulae of PCLU, PCBU, cis-PCCU and trans-PCCU.

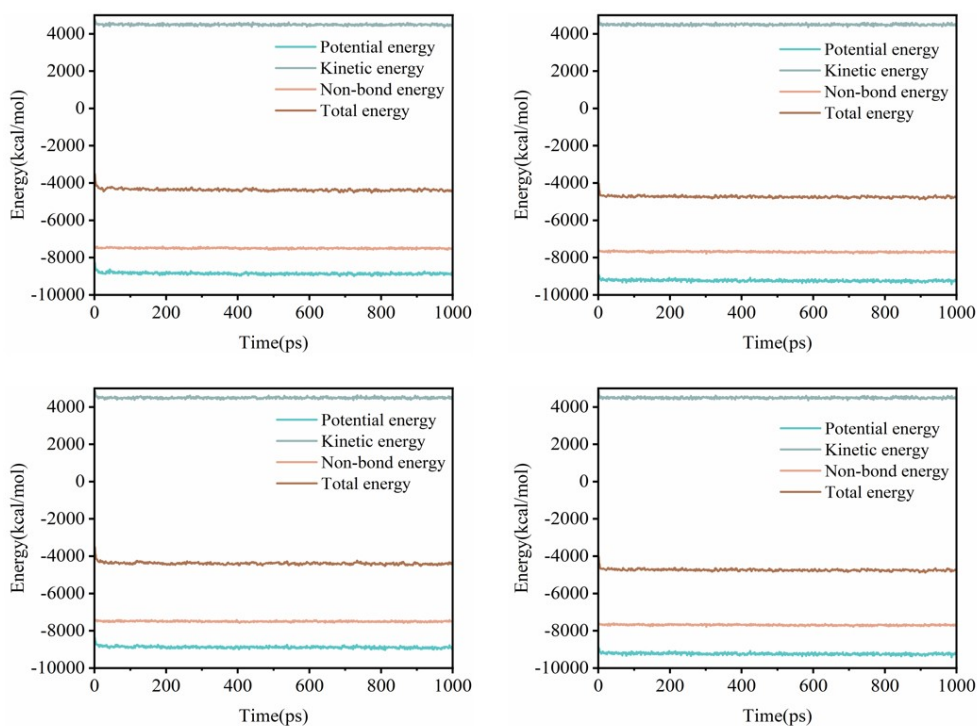

**Fig.S2** Statistics on the number of hydrogen bonds, hydrogen bond length and hydrogen bond angle of PCLU, PCBU, cis-PCCU and trans-PCCU.

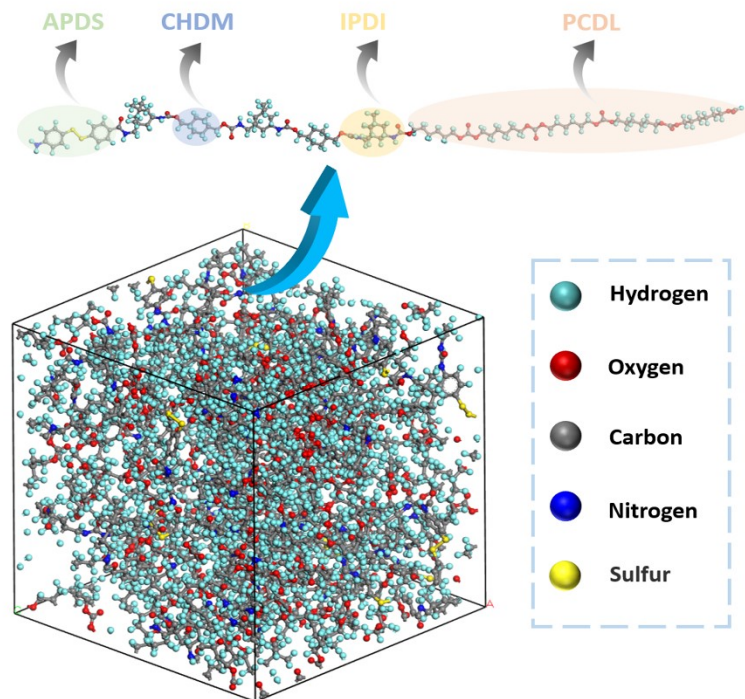

**Fig. S3** Single chain model and condensed state model for PCUU system.

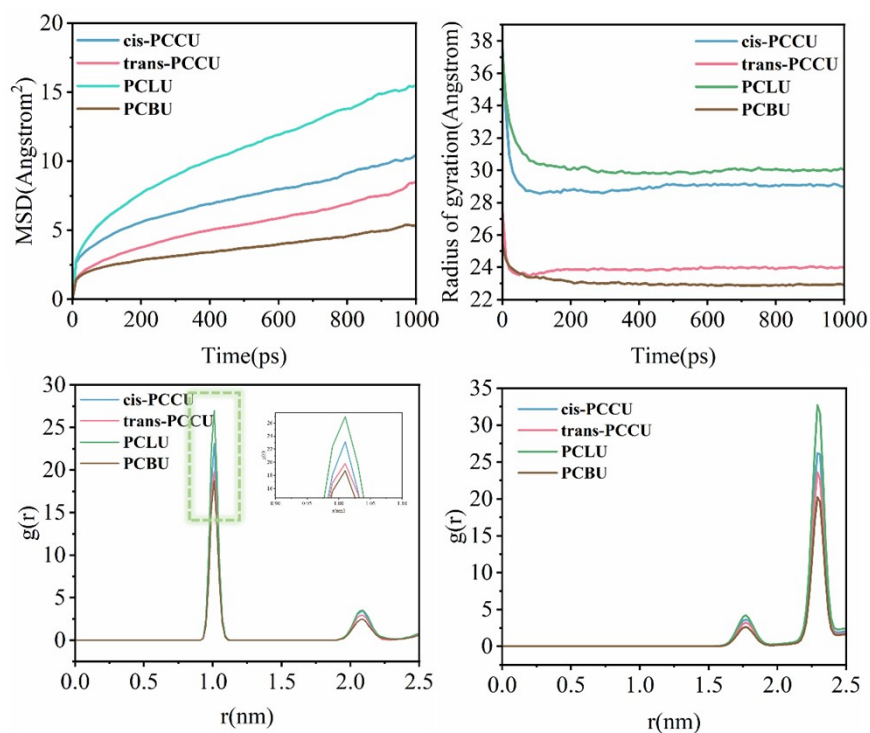

**Fig. S4** Mean Square Displacement Functions in Different Systems (i), mean square radius of gyration for different systems(ii), plot of the radial distribution function of the hydrogen bonds formed between N-H(iii) and O-H(iv).

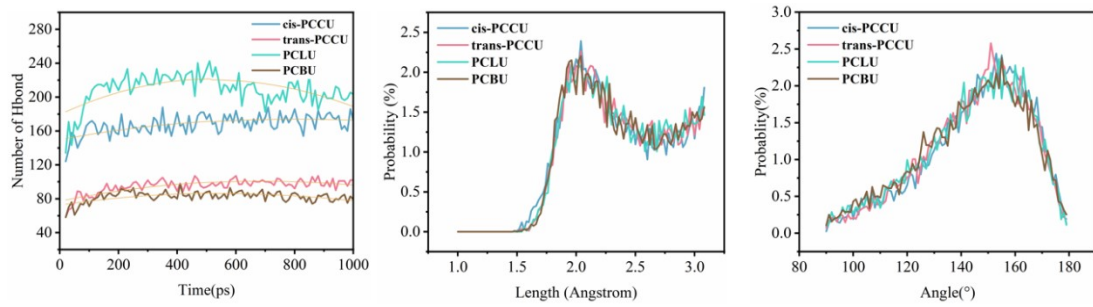

**Fig.S5** Energy balance of molecular simulation models for PCLU, PCBU, cis-PCCU and trans-PCCU.

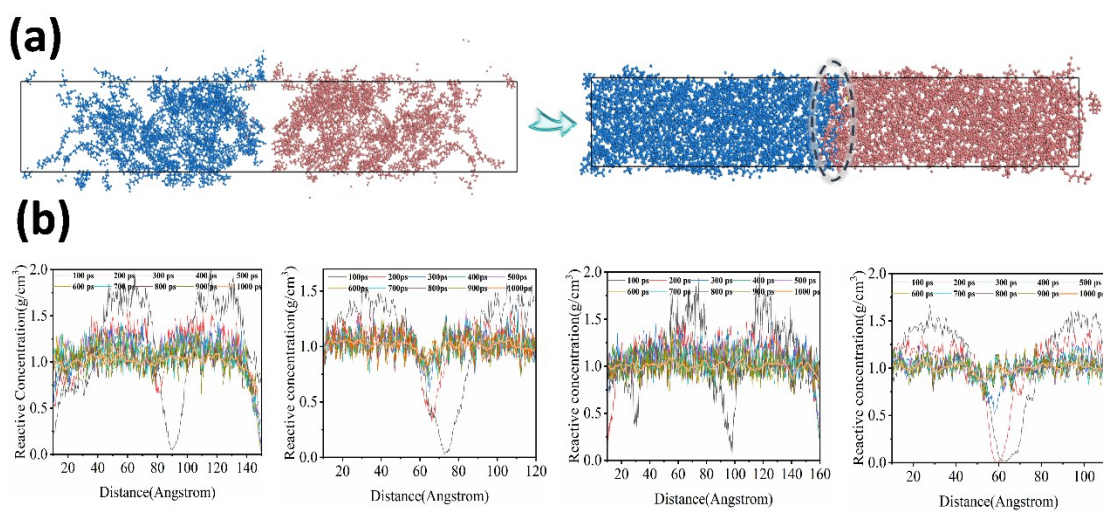

**Fig. S6** (a)MD simulates material self-healing processes; (b)Density plots over time for different systems.

**Table S1.** Molar ratios of raw materials for the synthesis of PCCU-1, PCCU-2 and PCCU-3.

|        | PCDL-diol | IPDI | CHDM | APDS |
|--------|-----------|------|------|------|
| PCCU-1 | 1         | 3    | 1    | 1    |
| PCCU-2 | 1         | 4    | 2    | 1    |
| PCCU-3 | 1         | 5    | 3    | 1    |

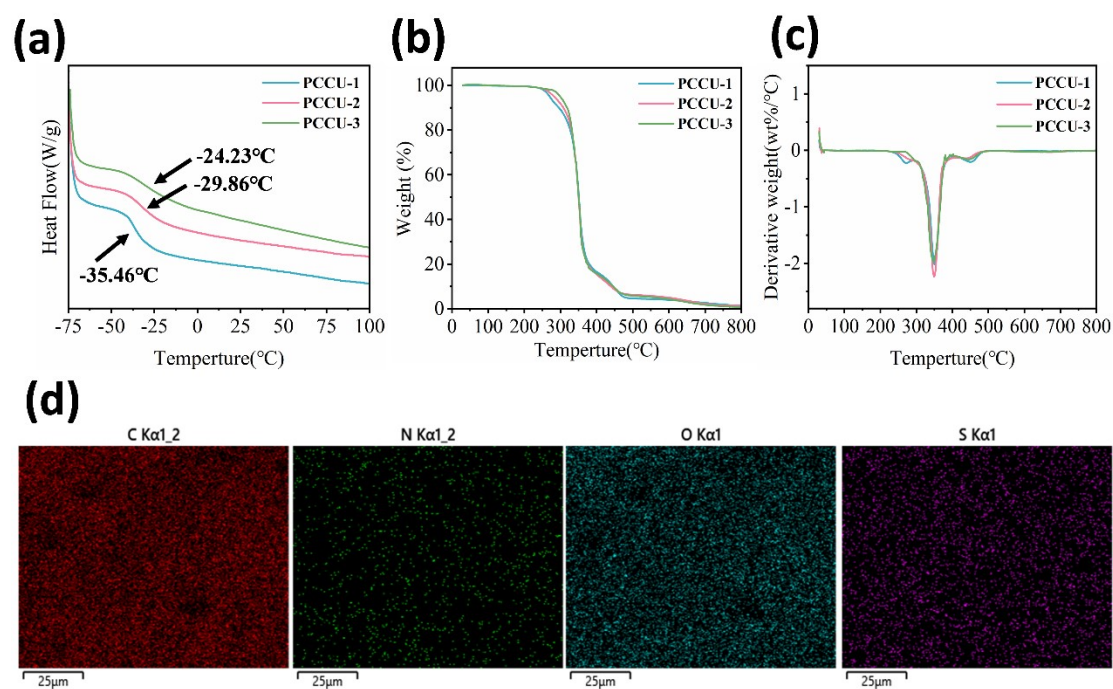

**Fig. S7** (a) DSC curves demonstrating the glass transition temperature of PCCU; (b) Heat loss curve of PCCU; (c) DTG curve of PCCU; (d) Distribution of elements in PCCU-2.



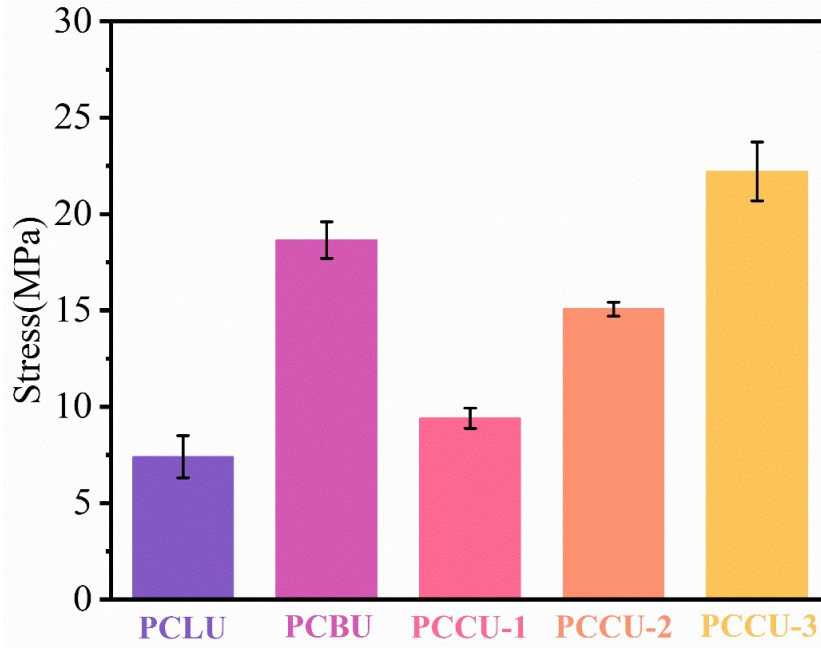

**Fig. S8** Statistics of tensile strength of PCLU, PCBU, PCCU-1, PCCU-2 and PCCU-3.

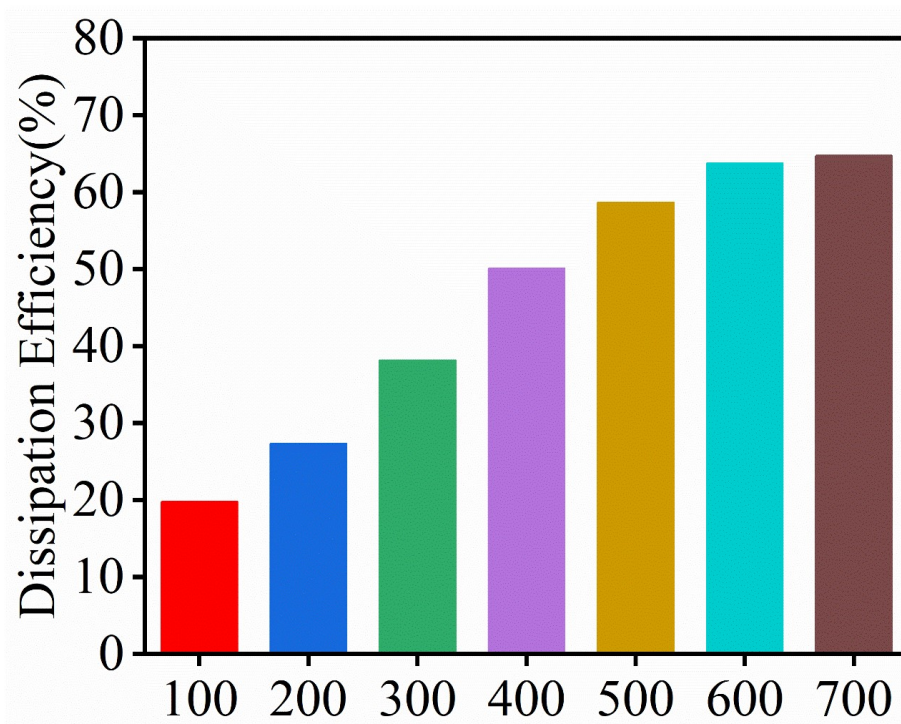

**Fig.S9** The statistical graph of the dissipation coefficient of PCCU-2 under tensile cycles at different strains.

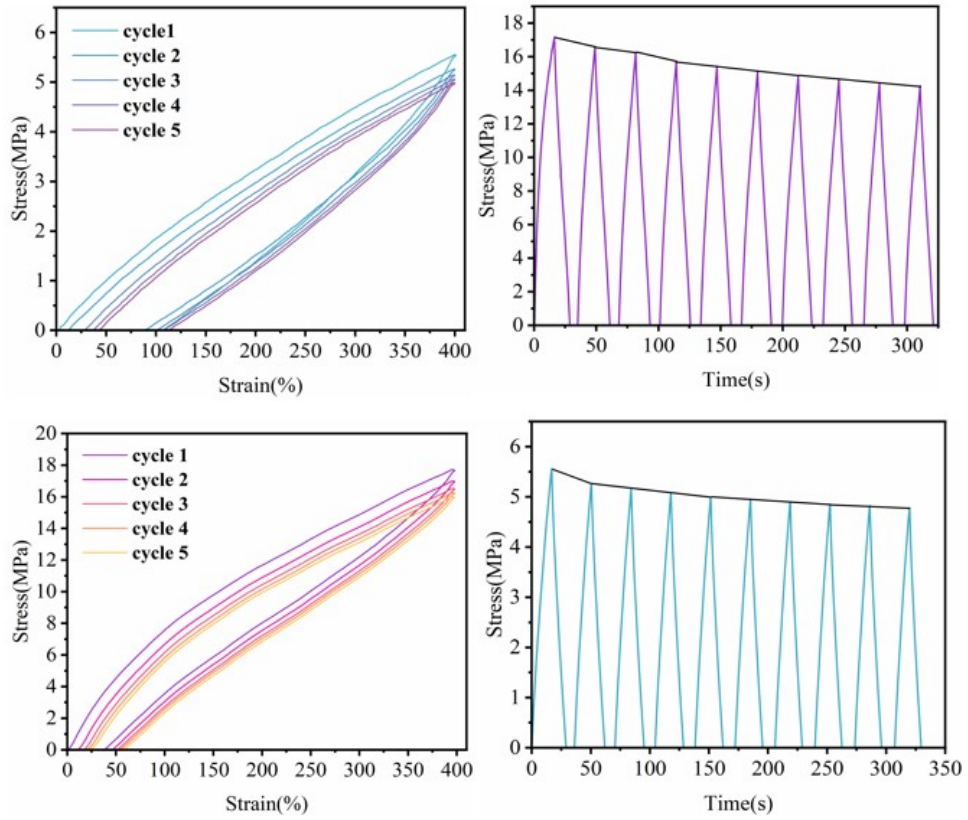

**Fig. S10** Tensile cycle curves and stress residual ratio of PCCU-1 and PCCU-3.

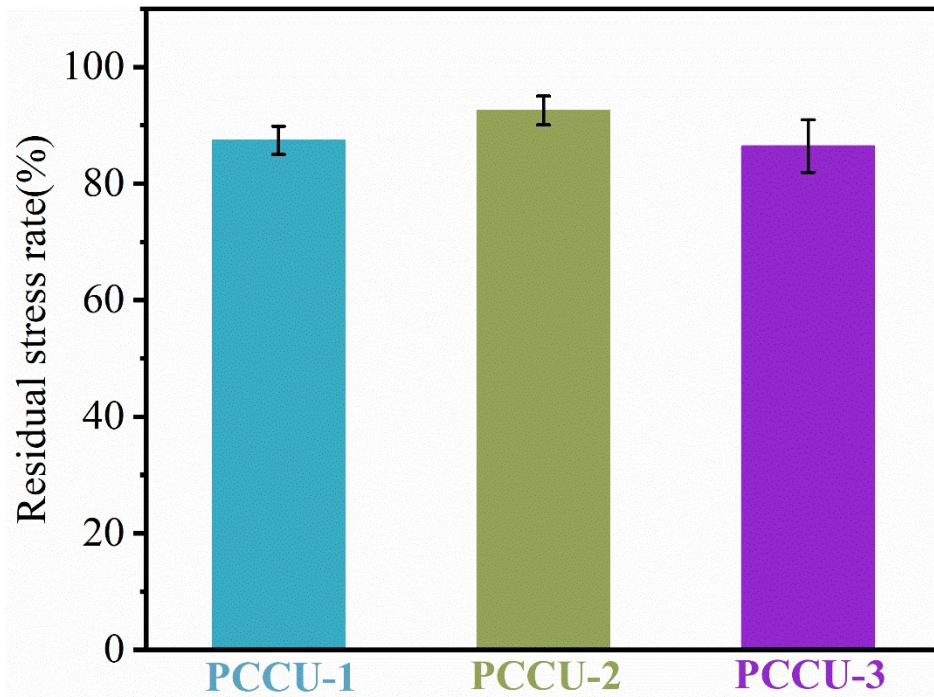

**Fig. S11** Statistics on stress residual ratio of PCCU-1, PCCU-2 and PCCU-3.

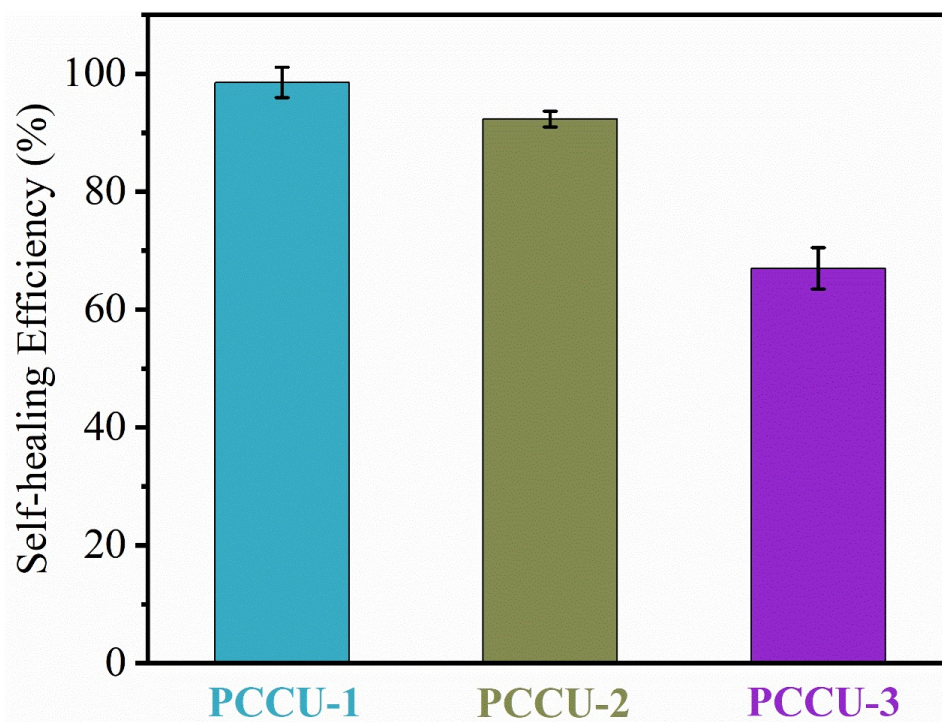

Fig. S12 Statistics on the self-repair efficiency of PCCU-1, PCCU-2 and PCCU-3.

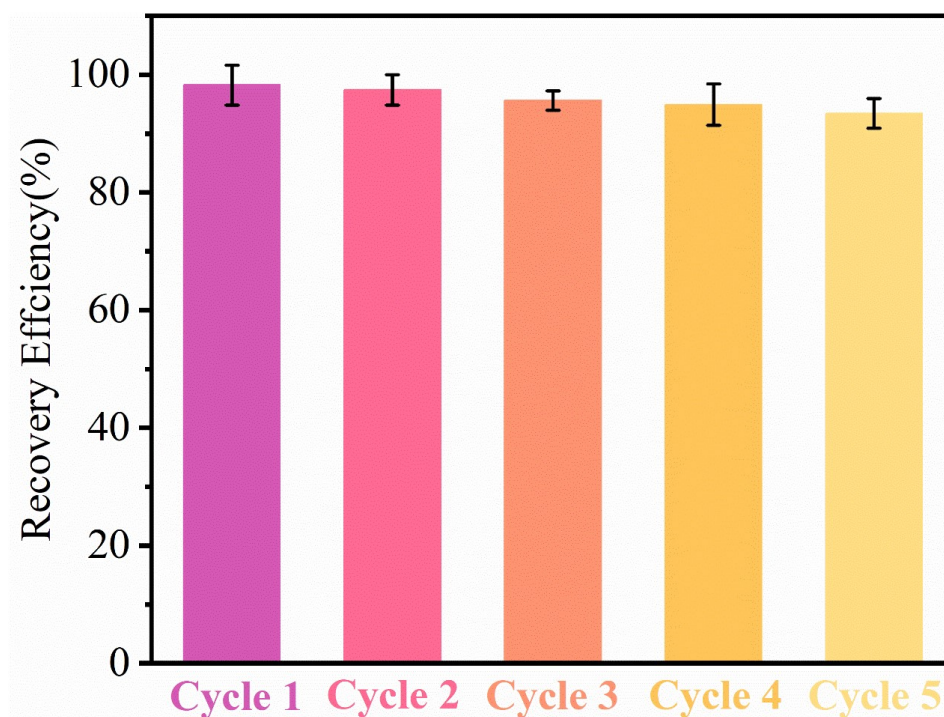

Fig. S13 Statistics on PCCU-2 recycle efficiency after different times in THF.



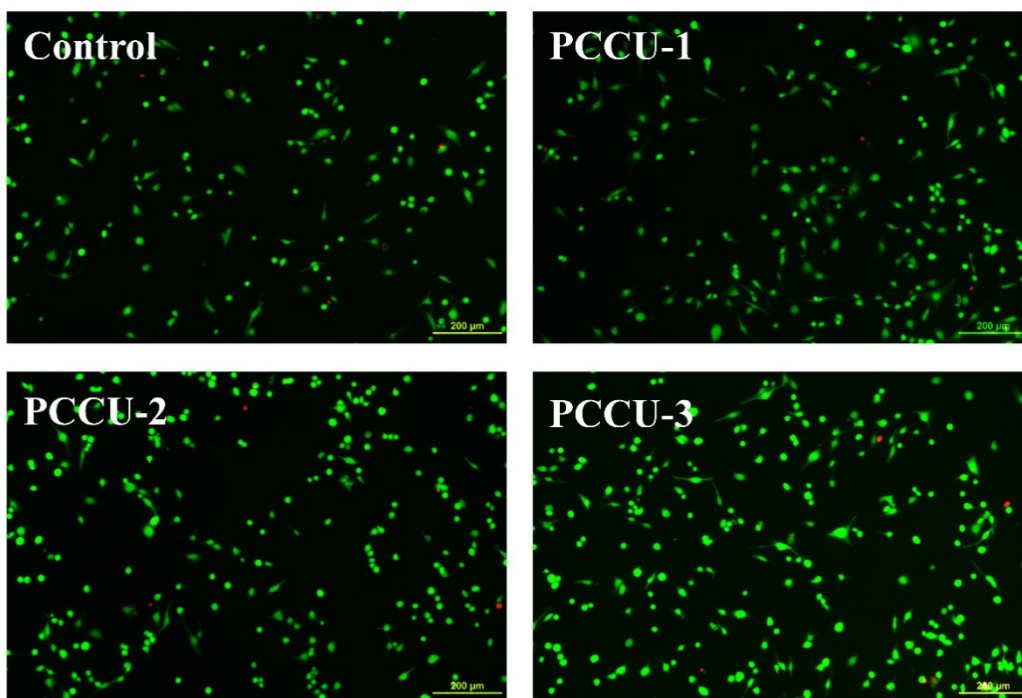

Fig. S14 The microscopic enlargement diagram of spindle formation by fibroblast cells is shown.

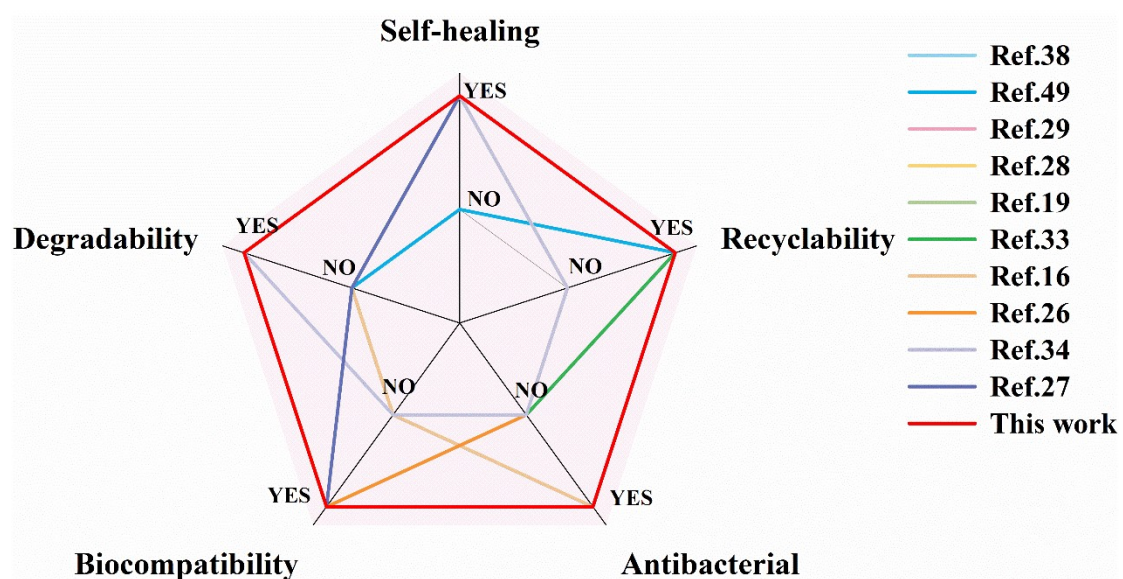

Fig.S15 Scatter plots show a qualitative comparison of this work with other reported sensor studies in terms of five key properties: self-healing, recyclability, degradability, antimicrobial and biocompatibility.

**Table S2.** This work compares with other reported sensor studies in four performance metrics: tensile strength, elongation at break, self-healing ability, and fatigue resistance.

|           | Strength<br>(MPa) | Elongation<br>(%) | Self-healing<br>(%) | Biocompatibility<br>(%) | Antibacterial<br>(%) | Recyclability<br>(%) | Degradability<br>(%) |
|-----------|-------------------|-------------------|---------------------|-------------------------|----------------------|----------------------|----------------------|
| This work | 15.09             | 910               | 92.75               | 89.74                   | 92.34                | 95.04                | 23.91                |
| Ref.20    | 0.78              | 438               | 76.1                | No                      | No                   | No                   | No                   |
| Ref.31    | 14.45             | 475               | 95                  | No                      | No                   | Yes                  | No                   |
| Ref.27    | 1.41              | 573               | 99.2                | No                      | Yes                  | No                   | No                   |
| Ref.36    | 32                | 527               | No                  | No                      | No                   | 85.21                | No                   |
| Ref.44    | 34                | 2014              | 83                  | No                      | No                   | 94.43                | No                   |
| Ref.38    | 8.11              | 983               | 73                  | No                      | No                   | Yes                  | No                   |
| Ref.49    | 34.4              | 1183              | No                  | No                      | Yes                  | No                   | 100                  |
| Ref.29    | 43                | 461               | 74                  | Yes                     | No                   | Yes                  | No                   |
| Ref.28    | 39.9              | 1930              | 94.4                | 88                      | 98.63                | No                   | No                   |
| Ref.19    | 75.8              | 712               | 88                  | No                      | No                   | Yes                  | No                   |
| Ref.33    | 29                | 500               | 100                 | No                      | No                   | Yes                  | No                   |
| Ref.16    | -                 | -                 | No                  | No                      | No                   | No                   | 21%                  |
| Ref.26    | 15.99             | 124               | 51.6                | No                      | No                   | No                   | No                   |
| Ref.34    | 14.08             | 974               | 81                  | No                      | No                   | Yes                  | No                   |

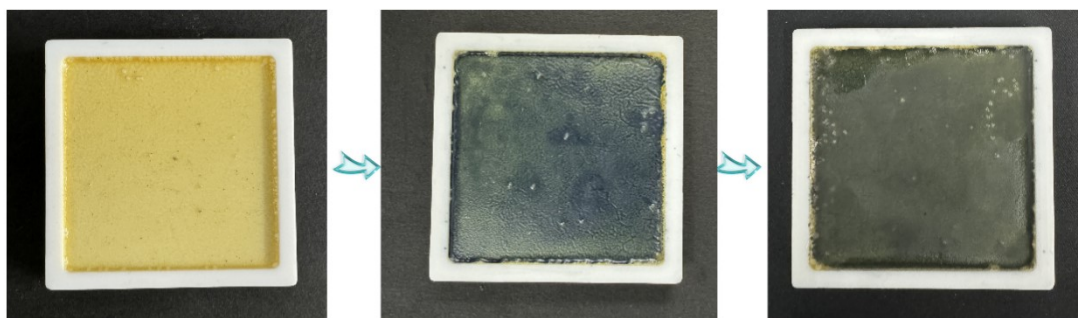

Fig. S16 Flowchart for the preparation of sandwich-structured sensing material.

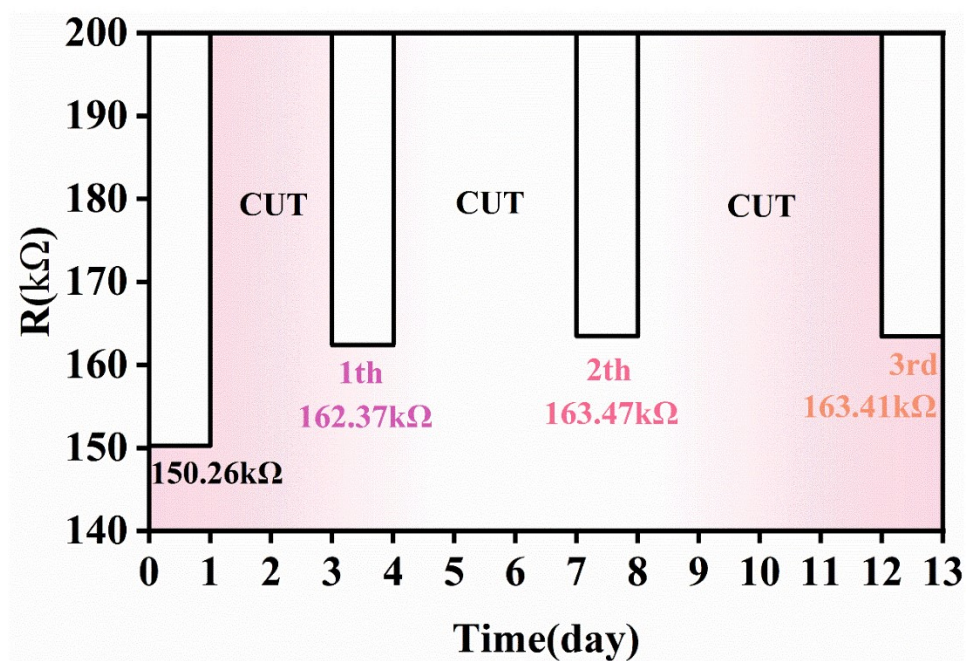

Fig. S17 Long-term stability test of the resistance of PCCU-2 conductive films.

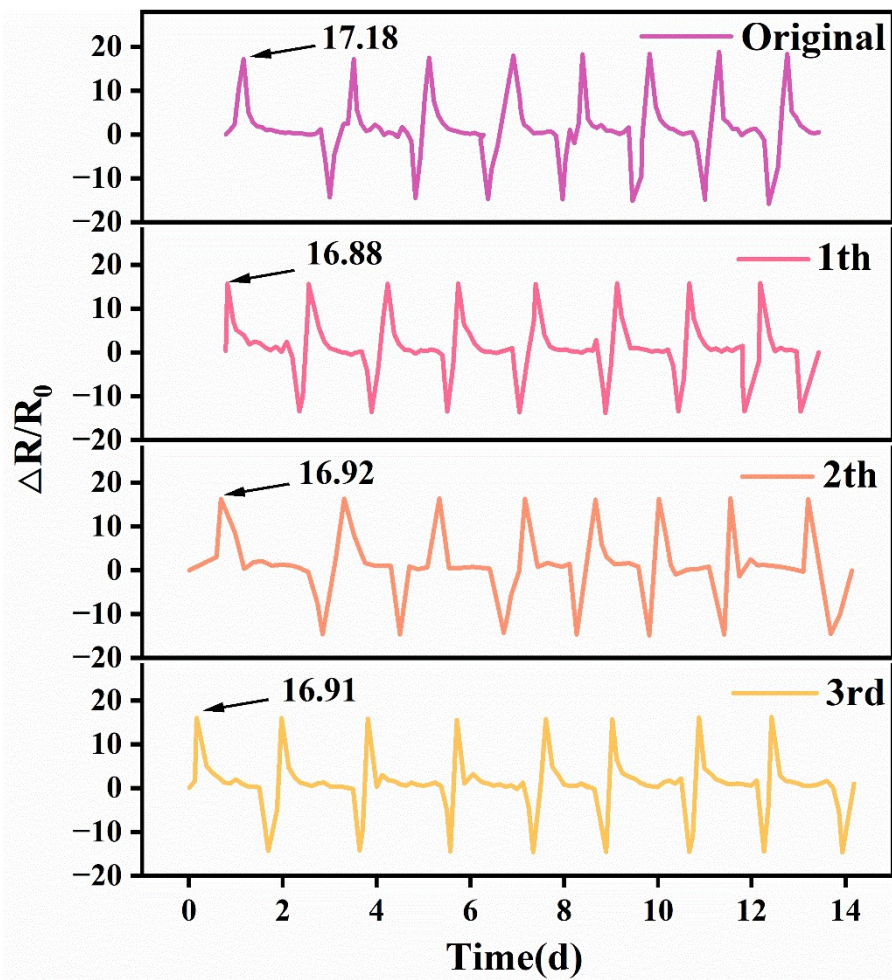

Fig. S18 PCCU-2 conductive film records knee bending signals.



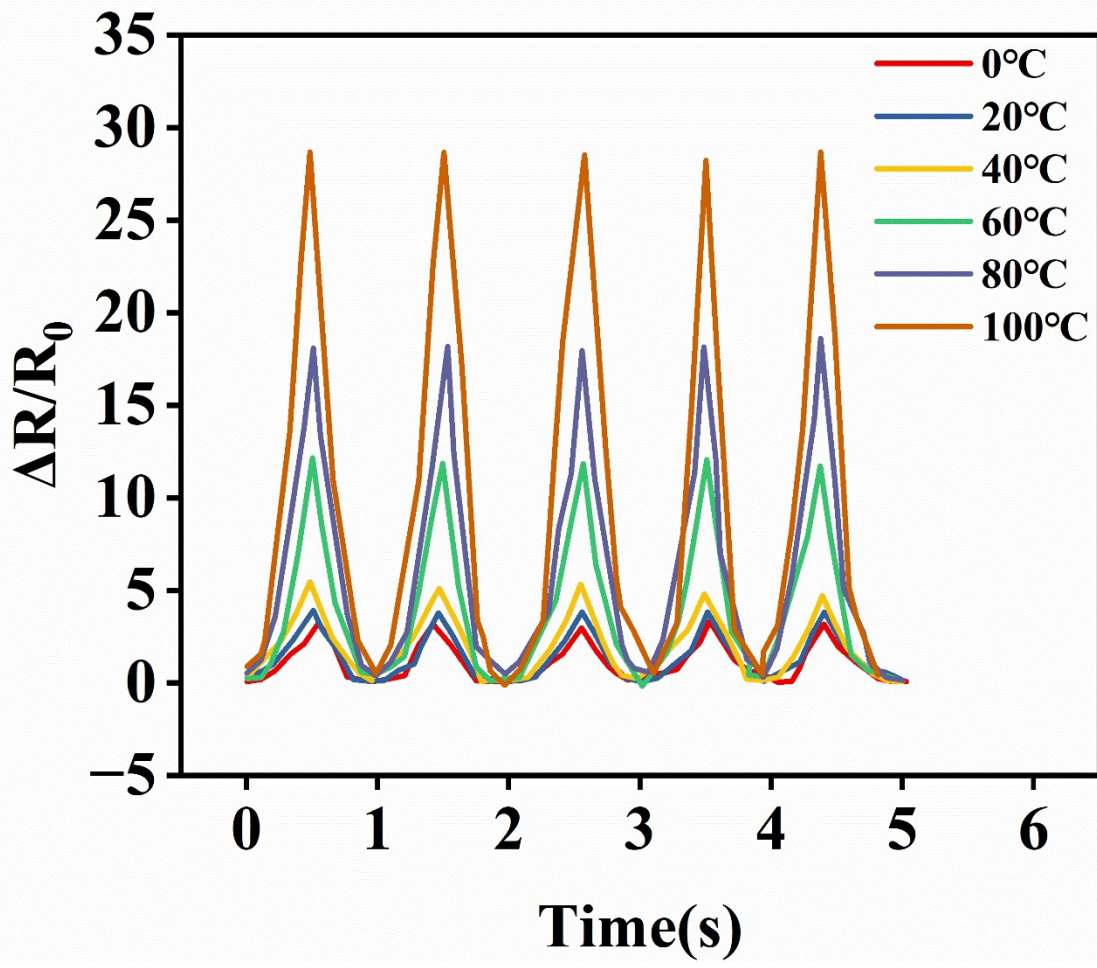

Fig. S19 Signals at different temperatures (50% tensile strain).
